# Supplementary material for: Various half-metallic nodal loops in organic Cr2N6C3 monolayers
Source: Royal Society of Chemistry journal article supplement (doi:10.1039/d0nr07485c), 2021-01-01
Supplement: d0nr07485c1.pdf [file d0nr07485c1.pdf]

## Supplementary Information

### **Various half-metallic nodal loops in organic Cr<sub>2</sub>N<sub>6</sub>C<sub>3</sub> monolayers**

Hairui Bao<sup>1</sup>, Bao Zhao<sup>1,2</sup>, Yang Xue<sup>3,1</sup>, Hao Huan<sup>1</sup>, Guanyi Gao<sup>1</sup>, Xiaojuan Liu<sup>1</sup>, and Zhongqin

Yang<sup>1,4\*</sup>

*<sup>1</sup>State Key Laboratory of Surface Physics and Key Laboratory of Computational Physical Sciences (MOE) & Department of Physics, Fudan University, Shanghai 200433, China*

*<sup>2</sup>School of Physics Science and Information Technology, Shandong Key Laboratory of Optical Communication Science and Technology, Liaocheng University, Liaocheng 252059, China*

*<sup>3</sup>School of Science, East China University of Science and Technology, Shanghai 200237, China*

*<sup>4</sup>Collaborative Innovation Center of Advanced Microstructures, Nanjing 210093, China*

**Corresponding Author**

\*E-mail: [zyang@fudan.edu.cn](mailto:zyang@fudan.edu.cn)

**Table SI:** The total energies (in eV) for FM, NM, AFM-N, AFM-ST, AFM-ZZ, and AFM-N-ST states for the Cr<sub>2</sub>N<sub>6</sub>C<sub>3</sub> ML without and with the Hubbard  $U$  (in eV) corrections.

|               | <b>FM</b>       | NM       | AFM-N    | AFM-ST   | AFM-ZZ   | AFM-N-ST |
|---------------|-----------------|----------|----------|----------|----------|----------|
| $U_{eff}=0$   | <b>-376.455</b> | -366.372 | -374.942 | -375.141 | -375.633 | -375.344 |
| $U_{eff}=3.5$ | <b>-356.944</b> | –        | -356.348 | -356.218 | -356.700 | -356.353 |

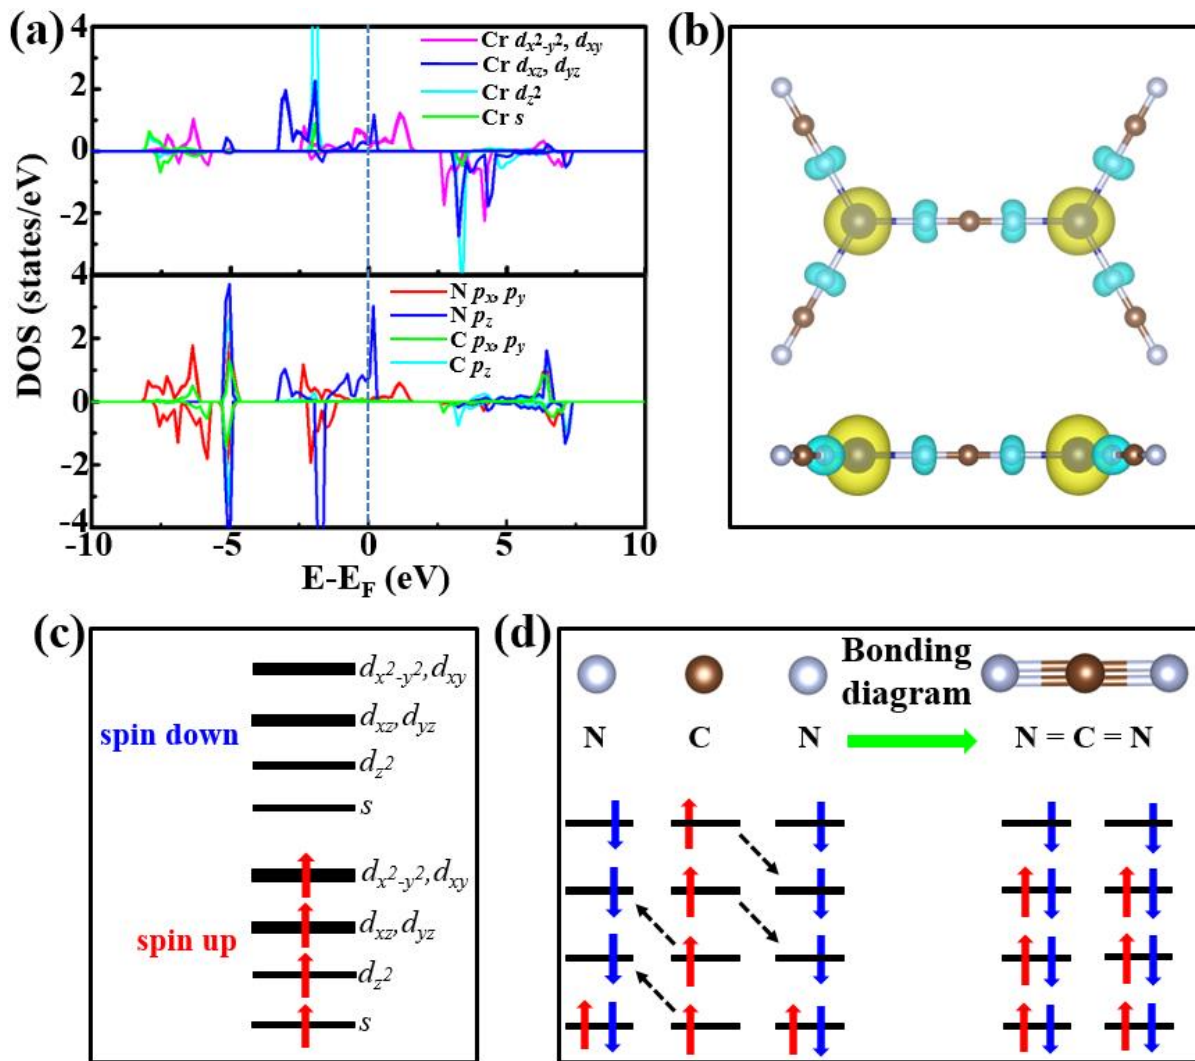

**Fig. S1:** (a) Orbital-resolved DOSs of the FM  $\text{Cr}_2\text{N}_6\text{C}_3$  ML. The positive and negative DOS values correspond to the spin-up and spin-down states, respectively. (b) Spatial distribution of the spin-polarized electron density for the  $\text{Cr}_2\text{N}_6\text{C}_3$  ML. The yellow and light blue colors denote the net spin-up and spin-down charge densities, respectively. (c) Electronic configuration of the Cr ions in the  $\text{Cr}_2\text{N}_6\text{C}_3$  ML. (d) Bonding diagram of the double bonds formed between the N and C atoms.

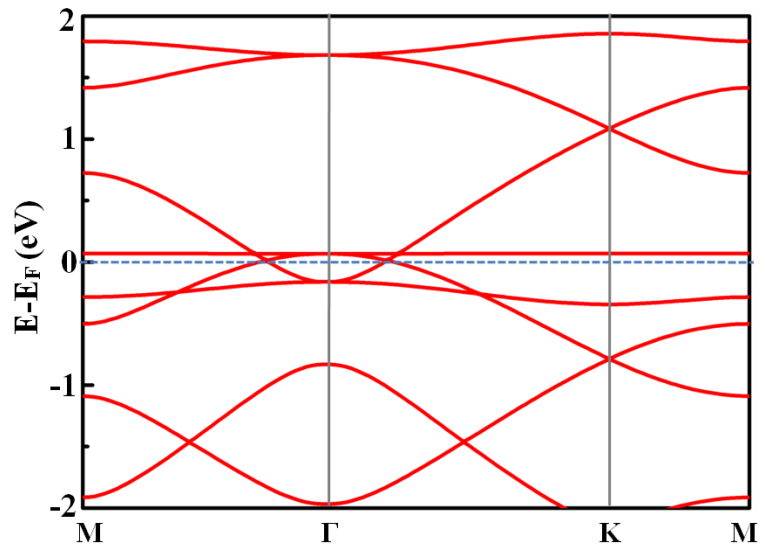

**Fig. S2:** Band structure of the Cr<sub>2</sub>N<sub>6</sub>C<sub>3</sub> ML with the HSE06 method. The SOC interaction is not considered.

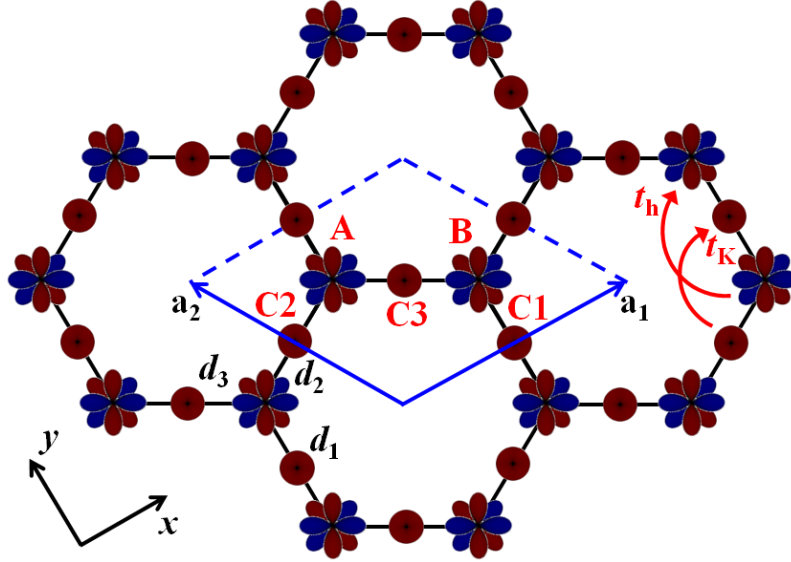

**Fig. S3:** The 2D honeycomb-Kagome lattice with five lattice sites per unit cell. The sites A and B both have two orbitals  $d_{x^2-y^2}$  and  $d_{xy}$ , while the sites C1, C2, and C3 all have single orbitals  $p_z$ . The blue arrows denote the lattice vectors, while the red arrows represent the nearest-neighbor hoppings  $t_h$  and  $t_K$  for honeycomb and Kagome sublattices, respectively. The position vectors  $d_i$  ( $i=1, 2, 3$ ) between the nearest-neighbor sites in the honeycomb sublattice are marked.

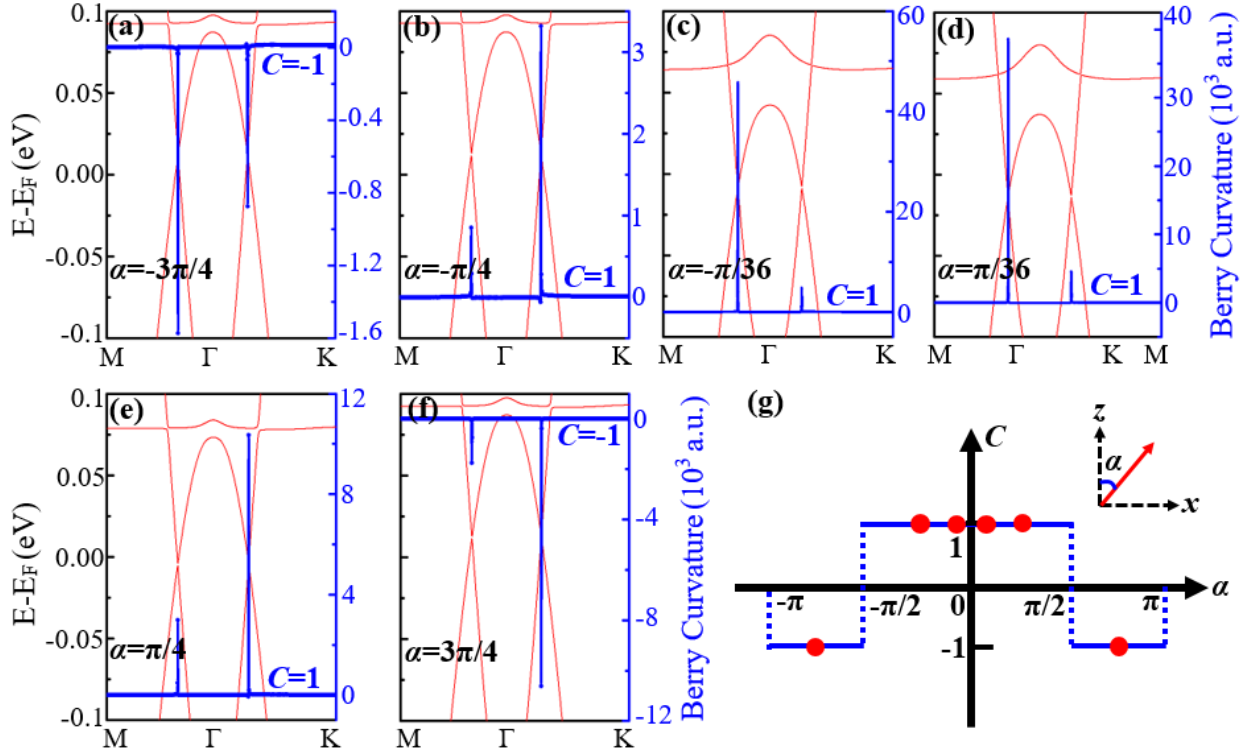

**Fig. S4:** (a)-(f) Band structures and Berry curvatures of the  $\text{Cr}_2\text{N}_6\text{C}_3$  MLs with the magnetization direction  $\alpha = -3\pi/4, -\pi/4, -\pi/36, \pi/36, \pi/4,$  and  $3\pi/4$ , respectively. For the cases of  $\alpha = -\pi/36$  and  $\pi/36$ , the SOC strength is tripled to obtain clear results. (g) The Chern number as a function of the magnetization direction  $\alpha$ .

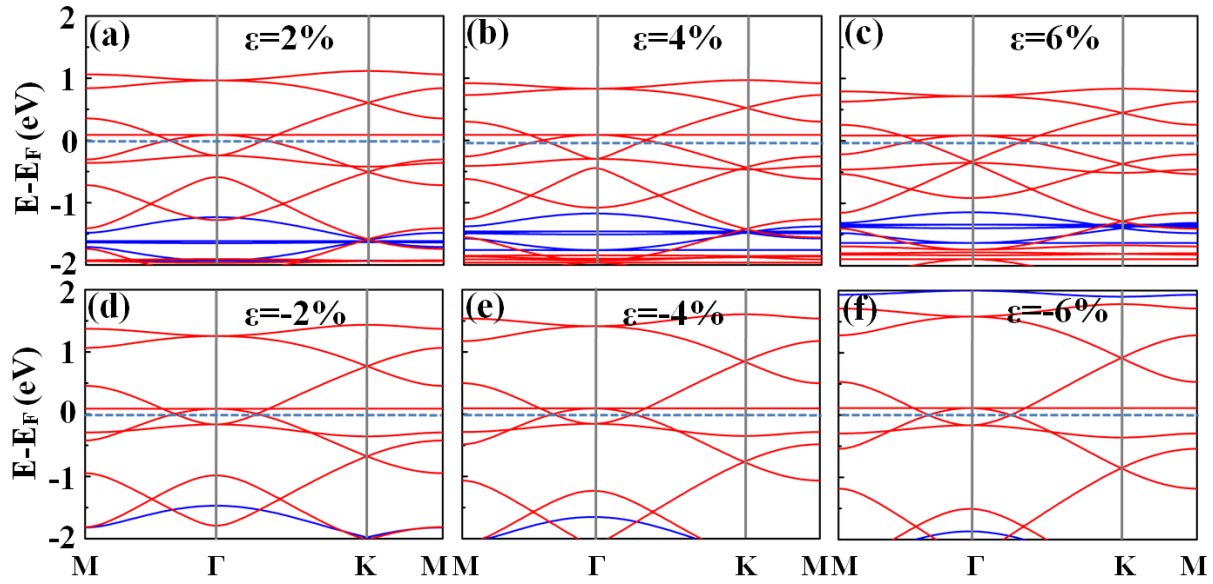

**Fig. S5:** Band structures of the  $\text{Cr}_2\text{N}_6\text{C}_3$  ML under the biaxial tensile (a)-(c) and compressive (d)-(f) strain with different magnitudes, respectively. The SOC interaction is not considered.

### Tight-binding Hamiltonian:

For the  $d_{x^2-y^2/xy}$ -honeycomb and  $p_z$ -Kagome combined lattices (Fig. S3), the real and reciprocal lattice vectors are respectively given by

$$\mathbf{a}_1 = a_0(1,0,0), \mathbf{a}_2 = a_0(-\frac{1}{2}, \frac{\sqrt{3}}{2}, 0), \mathbf{a}_3 = a_0(0,0,20/a_0);$$

$$\mathbf{b}_1 = \frac{2\pi}{\Omega}(\mathbf{a}_2 \times \mathbf{a}_3), \mathbf{b}_2 = \frac{2\pi}{\Omega}(\mathbf{a}_3 \times \mathbf{a}_1);$$

$$\Omega = |\mathbf{a}_1 \cdot (\mathbf{a}_2 \times \mathbf{a}_3)|,$$

where  $a_0$  is the optimized lattice constant.

The basis functions can be taken as  $|d_{x^2-y^2}^A\rangle, |d_{xy}^A\rangle, |d_{x^2-y^2}^B\rangle, |d_{xy}^B\rangle, |p_z^{C1}\rangle, |p_z^{C2}\rangle, |p_z^{C3}\rangle$ . Due to the opposite mirror eigenvalues of the two group orbitals accommodated on the different sublattices, the hopping between the Cr- $d_{x^2-y^2/xy}$  and N- $p_z$  orbitals is forbidden and thus the model Hamiltonian can be written as

$$H = H_h(\mathbf{k}) \oplus H_K(\mathbf{k}) = \begin{pmatrix} H_h^{\text{hop}}(\mathbf{k}) + H_h^{\text{SOC}}(\mathbf{k}) & 0 \\ 0 & H_K^{\text{hop}}(\mathbf{k}) + H_K^{\text{SOC}}(\mathbf{k}) \end{pmatrix}. \quad (1)$$

In Eq. (1), the

$$H_h^{\text{hop}}(\mathbf{k}) = \begin{pmatrix} H^{AA}(\mathbf{k}) & H^{AB}(\mathbf{k}) \\ H^{BA}(\mathbf{k}) & H^{BB}(\mathbf{k}) \end{pmatrix} = \begin{pmatrix} \epsilon_d & 0 & h_{x^2-y^2, x^2-y^2}^{\text{AB}} & h_{x^2-y^2, xy}^{\text{AB}} \\ 0 & \epsilon_d & h_{xy, x^2-y^2}^{\text{AB}} & h_{xy, xy}^{\text{AB}} \\ \dagger & \dagger & \epsilon_d & 0 \\ \dagger & \dagger & 0 & \epsilon_d \end{pmatrix}, \quad (2)$$

where  $h_{x^2-y^2, x^2-y^2}^{\text{AB}} = \sum_i [\frac{3}{4}(l_i^2 - m_i^2)^2 V_{dd\sigma} + [l_i^2 + m_i^2 - (l_i^2 - m_i^2)^2] V_{dd\pi} + [n_i^2 + (l_i^2 - m_i^2)^2/4] V_{dd\delta}] e^{i\mathbf{k} \cdot \mathbf{d}_i}$ ,

$$h_{xy, xy}^{\text{AB}} = \sum_i [3l_i^2 m_i^2 V_{dd\sigma} + (l_i^2 + m_i^2 - 4l_i^2 m_i^2) V_{dd\pi} + (n_i^2 + l_i^2 m_i^2) V_{dd\delta}] e^{i\mathbf{k} \cdot \mathbf{d}_i}, \quad (4)$$

$$h_{xy, x^2-y^2}^{\text{AB}} = \sum_i [\frac{3}{2} l_i m_i (l_i^2 - m_i^2) V_{dd\sigma} + 2l_i m_i (m_i^2 - l_i^2) V_{dd\pi} + [l_i m_i (l_i^2 - m_i^2)/2] V_{dd\delta}] e^{i\mathbf{k} \cdot \mathbf{d}_i}.$$



(5)

In Eqs. (2-5), the  $\epsilon_d$  is the on-site energy of  $d_{x^2-y^2/xy}$  orbital, the  $l$ ,  $m$ , and  $n$  are the direction cosines, and the  $V_{dd\sigma}$ ,  $V_{dd\pi}$ , and  $V_{dd\delta}$  are the Slater-Koster hopping parameters for the different bonding ( $\sigma$ ,  $\pi$ , and  $\delta$ ) between the  $d_{x^2-y^2}$  and  $d_{xy}$  orbitals. In Eq. (1), the

$$H_{\mathbf{K}}^{\text{hop}}(\mathbf{k}) = - \begin{pmatrix} \epsilon_p & 2t_K \cos[\mathbf{k} \cdot (\mathbf{d}_1 - \mathbf{d}_3)/2] & 2t_K \cos[\mathbf{k} \cdot (\mathbf{d}_2 - \mathbf{d}_3)/2] \\ 2t_K \cos[\mathbf{k} \cdot (\mathbf{d}_1 - \mathbf{d}_3)/2] & \epsilon_p & 2t_K \cos[\mathbf{k} \cdot (\mathbf{d}_2 - \mathbf{d}_1)/2] \\ 2t_K \cos[\mathbf{k} \cdot (\mathbf{d}_2 - \mathbf{d}_3)/2] & 2t_K \cos[\mathbf{k} \cdot (\mathbf{d}_2 - \mathbf{d}_1)/2] & \epsilon_p \end{pmatrix}, \quad (6)$$

where the  $\epsilon_p$  and  $t_K$  are the on-site energy and nearest-neighbor hopping of the  $p_z$  orbital, respectively.

The SOC terms in Eq. (1) are given by

$$H_{\text{h}}^{\text{SOC}}(\mathbf{k}) = 2\lambda_1 \begin{pmatrix} 0 & -i & 0 & 0 \\ i & 0 & 0 & 0 \\ 0 & 0 & 0 & -i \\ 0 & 0 & i & 0 \end{pmatrix} \quad (7)$$

and

$$H_{\mathbf{K}}^{\text{SOC}}(\mathbf{k}) = 2i\lambda_2 \begin{pmatrix} 0 & \cos[\mathbf{k} \cdot (\mathbf{d}_1 - \mathbf{d}_3)/2] & -\cos[\mathbf{k} \cdot (\mathbf{d}_2 - \mathbf{d}_3)/2] \\ -\cos[\mathbf{k} \cdot (\mathbf{d}_1 - \mathbf{d}_3)/2] & 0 & \cos[\mathbf{k} \cdot (\mathbf{d}_2 - \mathbf{d}_1)/2] \\ \cos[\mathbf{k} \cdot (\mathbf{d}_2 - \mathbf{d}_3)/2] & -\cos[\mathbf{k} \cdot (\mathbf{d}_2 - \mathbf{d}_1)/2] & 0 \end{pmatrix}. \quad (8)$$
